# Supplementary material for: A 19F NMR probe for the detection of β-galactosidase: simple structure with low molecular weight of 274.2, “turn-on” signal without the background, and good performance applicable in cancer cell line
Source: Royal Society of Chemistry journal article supplement (doi:10.1039/c7tb00616k), 2017-01-01
Supplement: c7tb00616k1.pdf [file c7tb00616k1.pdf]

## **Electronic Supplementary Information**

# **A $^{19}\text{F}$ NMR Probe for the Detection of $\beta$ -galactosidase: Simple Structure with Low Molecular Weight of 274.2, “Turn-on” Signal without the Background, and Good Performance applicable in Cancer Cell Line**

Jie Hu,<sup>+, †</sup> Qiong Wu,<sup>#, †</sup> Kai Cheng,<sup>#</sup> Yujun Xie,<sup>+</sup> Conggang Li,<sup>#, \*</sup> and Zhen Li<sup>+, \*</sup>

<sup>+</sup> Department of Chemistry, Hubei Key Lab on Organic and Polymeric Opto-Electronic Materials, Wuhan University, Wuhan 430072, China. Email: [lizhen@whu.edu.cn](mailto:lizhen@whu.edu.cn) or [lichemlab@163.com](mailto:lichemlab@163.com).

<sup>#</sup> China State Key Laboratory of Magnetic Resonance and Atomic and Molecular Physics, Wuhan Institute of Physics and Mathematics, The Chinese Academy of Sciences, Wuhan 430071, China.

Email: [conggangli@wipm.ac.cn](mailto:conggangli@wipm.ac.cn).

<sup>†</sup> Contribute equally to this manuscript.

---

## Table of Contents:

1. Calculation of the Probe
2. NMR and MS spectra
3. Toxicity test
4. Derivations of formulas

### 1. Calculation of the probe

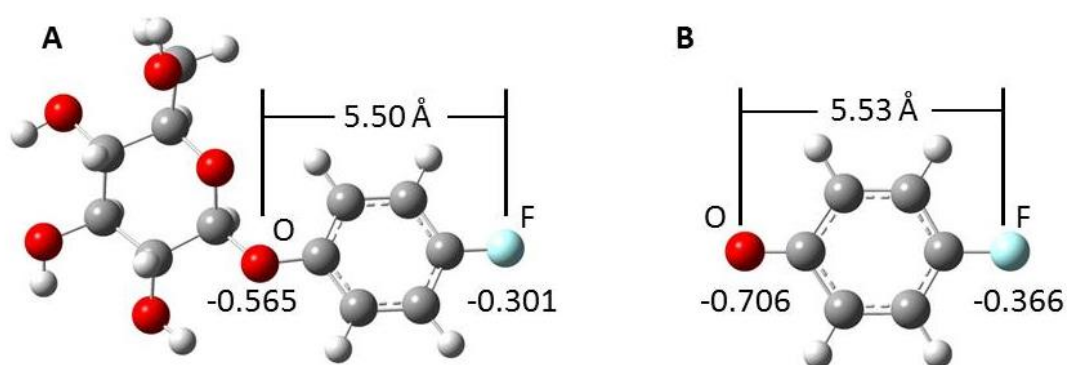

**Figure S1.** Mulliken charge of the fluorine and oxygen atoms and F-O distances in FB-βGal (A) and FB (B).

### 2. NMR and MS spectra

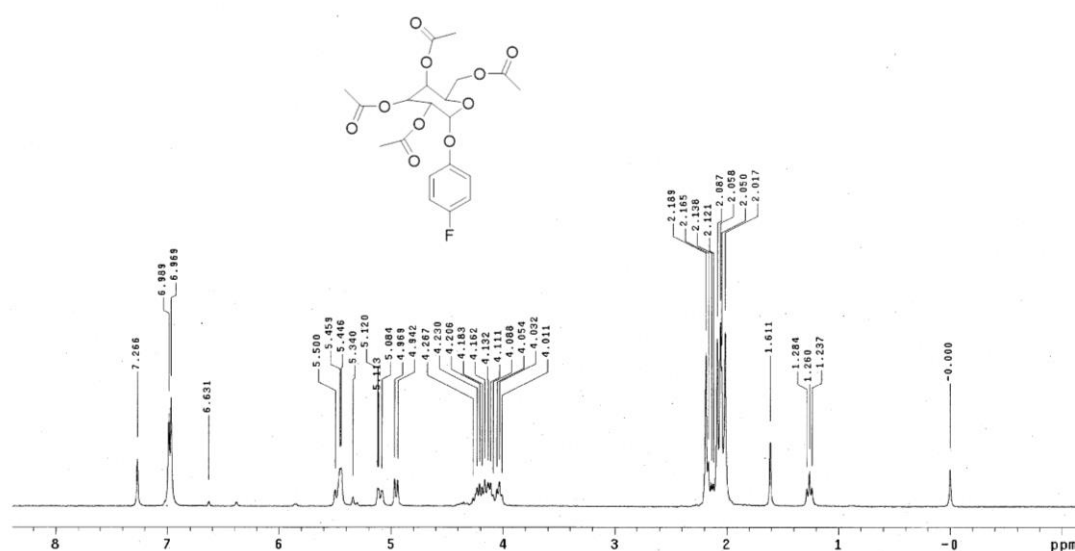

**Figure S2.** <sup>1</sup>H NMR spectrum of FB-βGalAc in 100% CD<sub>2</sub>Cl<sub>2</sub> at 25 °C.

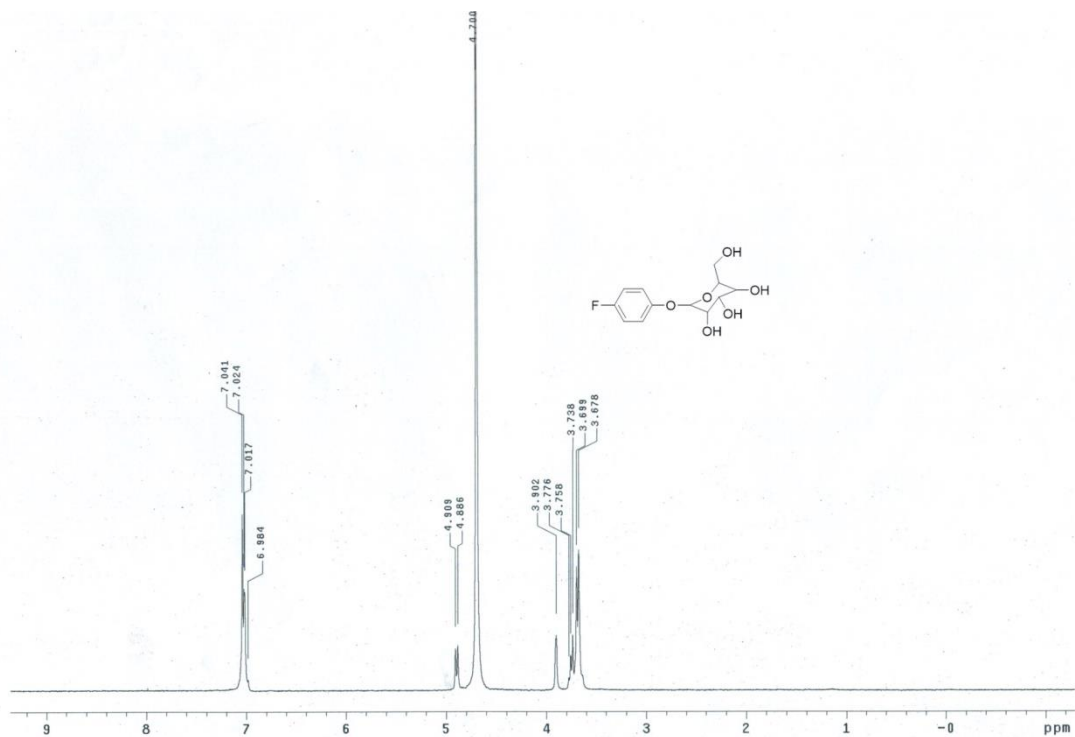

**Figure S3.** <sup>1</sup>H NMR spectrum of FB-βGal in 100% D<sub>2</sub>O at 25 °C.

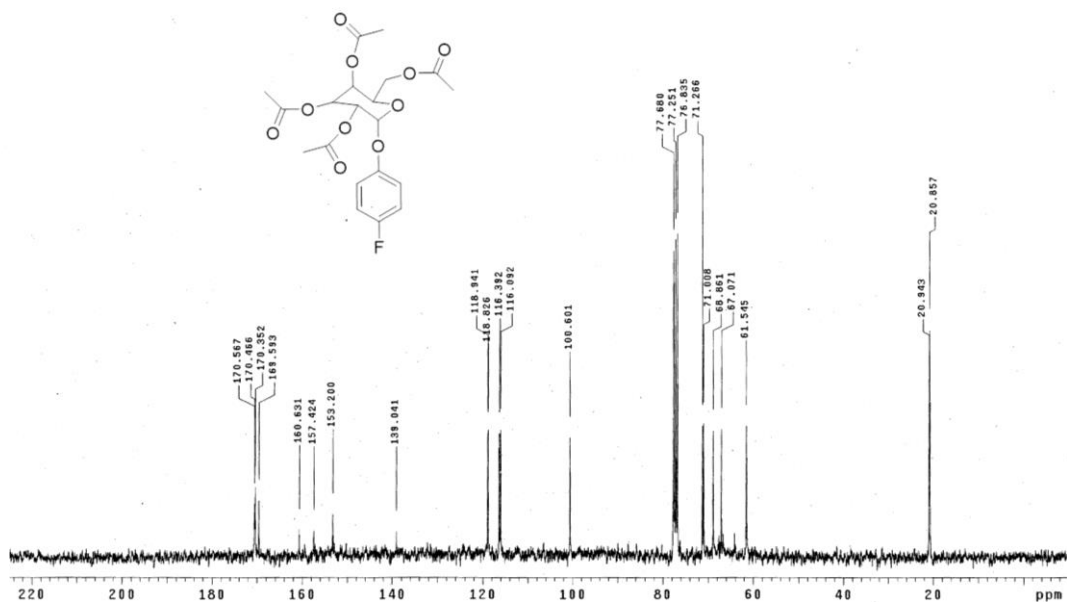

**Figure S4.** <sup>13</sup>C NMR spectrum of FB-βGalAc in 100% CD<sub>2</sub>Cl<sub>2</sub> at 25 °C.

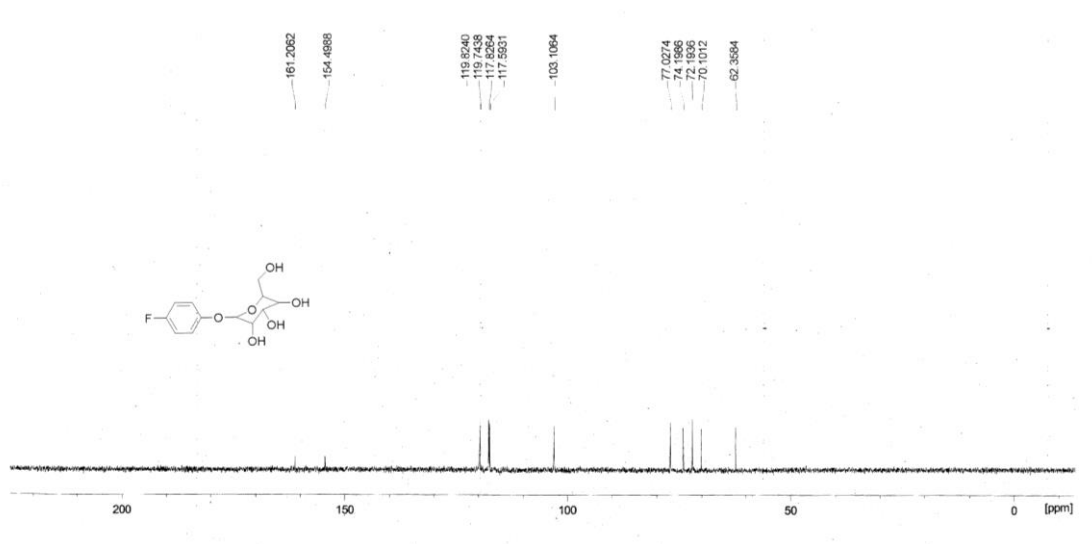

**Figure S5.** <sup>13</sup>C NMR spectrum of FB-βGal in 100% D<sub>2</sub>O at 25 °C.

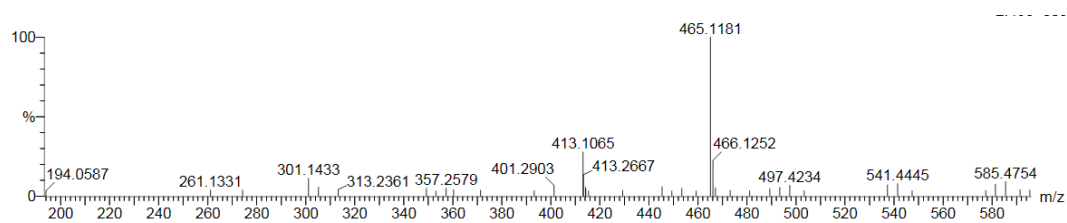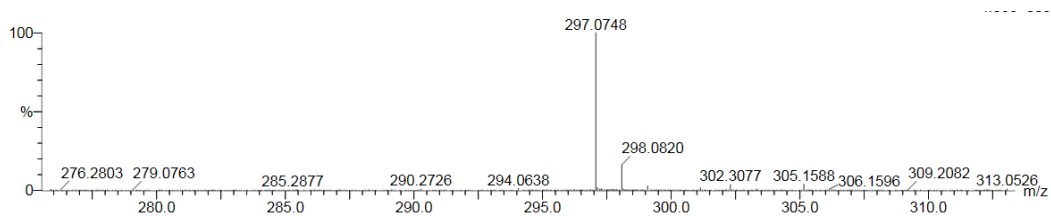

**Figure S6.** Mass analysis of FB-βGal and FB.

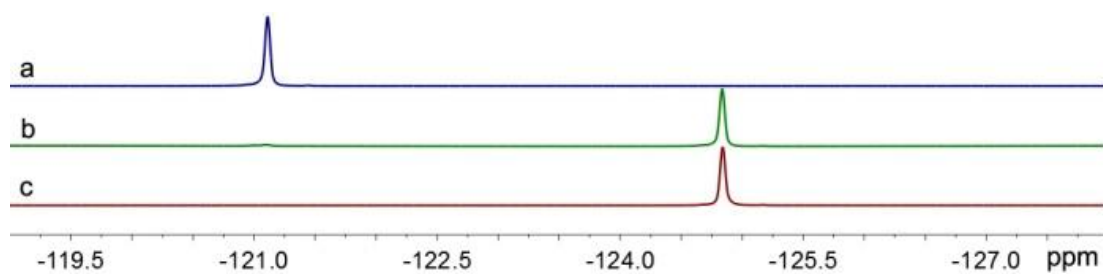

**Figure S7.** <sup>19</sup>F NMR spectra of (a) FB-βGal, (b) after the addition of βGal to the solution containing FB-βGal, and (c) FB.

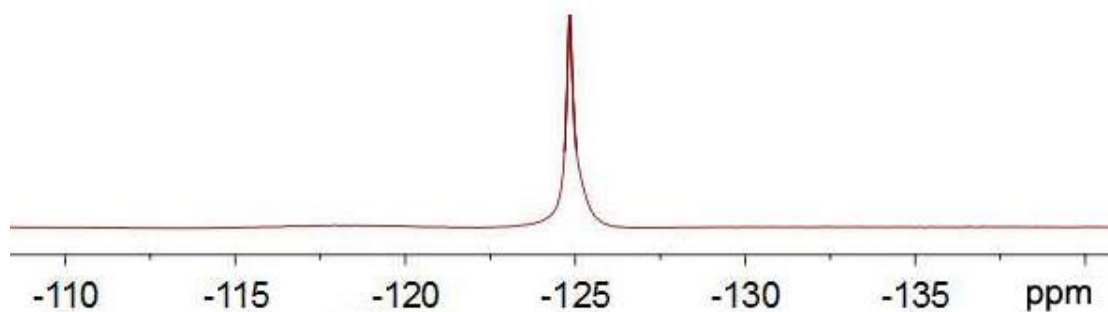

**Figure S8.**  $^{19}\text{F}$  NMR spectrum which was obtained after the addition of FB- $\beta$ Gal at a very low concentration of  $3.65 \times 10^{-6}$  M in E.Coli overexpressed  $\beta$ -gal within 2 minutes.

### 3. Toxicity test

**Table S1. Toxicity text of FB- $\beta$ Gal to Hela cells and OVCAR-3 cells by MTT methods.**

|                                    | 1            | 2            | 3            |
|------------------------------------|--------------|--------------|--------------|
| <b>Mdium DMEM</b>                  | <b>0.098</b> | <b>0.116</b> | <b>0.099</b> |
| <b>HeLa cells</b>                  | <b>2.662</b> | <b>2.629</b> | <b>2.645</b> |
| <b>HeLa cells + probe (2 mM)</b>   | <b>2.611</b> | <b>2.651</b> | <b>2.703</b> |
| <b>HeLa cells + probe (4 mM)</b>   | <b>2.684</b> | <b>2.692</b> | <b>2,785</b> |
| <b>Mdium 1640</b>                  | <b>0.069</b> | <b>0.070</b> | <b>0.063</b> |
| <b>OVCAR-3 cells</b>               | <b>2.196</b> | <b>2.151</b> | <b>2.148</b> |
| <b>OVCAR-3 cells + probe (2mM)</b> | <b>2.152</b> | <b>2.170</b> | <b>2.123</b> |
| <b>OVCAR-3 cells + probe (4mM)</b> | <b>2.190</b> | <b>2.224</b> | <b>2.164</b> |

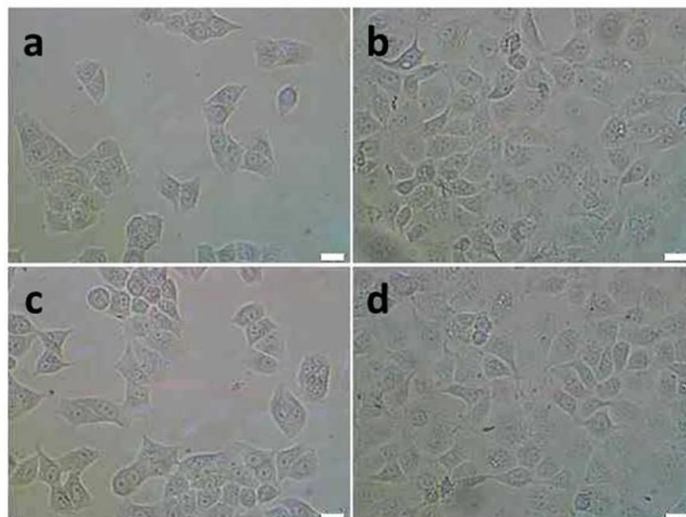

**Figure S9.** Images taken under daylight (a) HeLa cells (b) OVCAR-3 cells (c) HeLa cells incubated with FB-βGal (4nM) for 6 hours (d) OVCAR-3 cells incubated with FB-βGal (4 nM) for 6 hours.

Scale bar: 20 μm.

#### 4. Derivations of formulas

For  $^{19}\text{F}$  NMR spectrum, the integral are the same when the F atoms are the same per mole. And derivations of these formulas are based on the assumption that the probe and β-gal reacted with the same amount .So

$$\frac{I_a}{C_0V-CV} = \frac{I_b}{CV}$$

The volume was always 500 μL. So

$$C = \frac{I_b C_0}{I_a + I_b}$$

The ratio value of the integral at -124.8 ppm to that at -121.1 ppm is

$$n = \frac{I_b}{I_a}$$

The equation becomes:

$$C = \frac{nC_0}{1+n}$$
